# Supplementary material
Source: PubMed Central journal article supplement (PMC3307320)
Supplement: supp_M111.322024_jbc.M111.322024-1.pdf [file supp_M111.322024_jbc.M111.322024-1.pdf]

## SUPPLEMENTARY DATA

Sequences Prior to Conserved Catalytic Motifs of the Polysialyltransferase, ST8Sia IV, are Required for Substrate Recognition

Joseph L. Zapater and Karen J. Colley

### SUPPLEMENTAL EXPERIMENTAL METHODS

***Transfection of COS-1 Cells with Wild-type or Mutant PST cDNAs***—COS-1 cells maintained in Dulbecco's modified Eagle's medium (DMEM), 10% fetal bovine serum (FBS) were plated onto 12-mm glass coverslips and grown in a 37°C, 5% CO<sub>2</sub> cell incubator until 50-70% confluent. Cells on each coverslip were then transfected with 0.5 µg of PST-, sPST- or mutant PST-Myc DNA in 300 µL of OPTI-MEM I supplemented with 3 µL of Lipofectin transfection reagent. Cells were then incubated with the transfection mixture for 6 h at 37°C, followed by the addition of 1 mL of DMEM, 10% FBS, and allowed to grow in the incubator for 18 h.

***Immunofluorescence Analysis of PST and Mutant PST Enzyme Localization and Activity***—COS-1 cells on glass coverslips were transfected with PST-, sPST- or a PST-Myc mutant cDNA as described above. Eighteen hours post-transfection, cells were washed with PBS then permeabilized with -20°C methanol to view internal structures as well as the cell membrane. Cells were incubated with the following primary antibodies diluted in immunofluorescence blocking buffer (5% normal goat serum in PBS): anti-Myc tag antibody (1:250) to detect expression and localization of PST or a mutant PST, and OL.28 anti-polySia antibody (1:100) to determine PST catalytic activity by detecting protein autopolysialylation. Following incubation at room temperature with the primary antibodies for 2 h, the cells were incubated for one hour with the following secondary antibodies diluted in blocking buffer: FITC-conjugated goat anti-mouse IgG (1:100) to visualize protein localization, and TRITC-conjugated goat anti-mouse IgM (1:100) to visualize autopolysialylation. After washing, the cells were briefly treated with 300 nM 4', 6-diamidino-2-phenyl-indole, dihydrochloride (DAPI) in PBS, and the coverslips were then mounted on glass slides using 20 µL mounting medium (15% Vinol 205 polyvinyl alcohol (w:v), 33% glycerol (v:v), 0.1% azide, pH 8.5). Cells were visualized with a Zeiss Axiovert 200 M inverted confocal microscope using a 63X oil immersion objective.

## SUPPLEMENTAL TABLE 1

PCR Primers used for site-directed mutagenesis

|                                 |                                                                                                |
|---------------------------------|------------------------------------------------------------------------------------------------|
| <b>PST H331K</b>                | 5'-CCAATGCAAGCCCTAAGAGAATGCCATTAG-3'<br>5'-CTAATGGCATTCTCTTAGGGCTTGCATTGG-3'                   |
| <b>PST140 XbaI site</b>         | 5'-CGCAGGTTTAAGACTCTAGACTGTGCAGTTG-3'<br>5'-CAACTGCACAGTCTAGAGTCTTAAACCTGCG-3'                 |
| <b>PST127 XbaI site</b>         | 5'-CATGATCTACATAGCCTCCTTCTAGAAGTTTCACCAATG-3'<br>5'-CATTGGTGAAACTTCTAGAAGGAGGCTATGTAGATCATG-3' |
| <b>PST105 XbaI site</b>         | 5'-AGTTTTAAGCCTGGTGATCTAGAACACTATGTGCTT-3'<br>5'-AAGCACATAGTGTTCTAGATCACCAGGCTTAAAACCT-3'      |
| <b>PST71 XbaI site</b>          | 5'-GTAGAAGGTTGGAATCTAGATTCCCTCTTTG-3'<br>5'-CAAAGAGGAATCTAGATTCCAACCTTCTAC-3'                  |
| <b>PST62 XbaI site</b>          | 5'-GCTGGCTCTTCAATTCTAGAGCACAATGTAGAA-3'<br>5'-TTCTACATTGTGCTCTAGAATTGAAGAGCCAGC-3'             |
| <b>sPST #1,2</b>                | 5'-AAAAAAAAGCTTGCTAGCTTGCTTGTTCTTTTTGCAG-3'<br>5'-AAAAAAGATATCAGAGTCAACGAAGGCTGCGGTG-3'        |
| <b>sPST #3,4</b>                | 5'-AAAAAAGATATCTCAATCTTCCAGCACAATGTAGAAGG-3'<br>5'-AAAAAATCTAGACCTTGCTTACACACTTTCCTGTTGTC-3'   |
| <b>PST / PSTH331K<br/>R82A</b>  | 5'-GTCCTAGAGATAGCGAAGAACATACTT-3'<br>5'-AAGTATGTTCTTCGCTATCTCTAGGAC-3'                         |
| <b>PST / PST H331K<br/>R93A</b> | 5'-TTAGATGCAGAAGCGGATGTGTCAGTG-3'<br>5'-CACTGACACATCCGCTTCTGCATCTAA-3'                         |

# SUPPLEMENTAL FIGURE S1

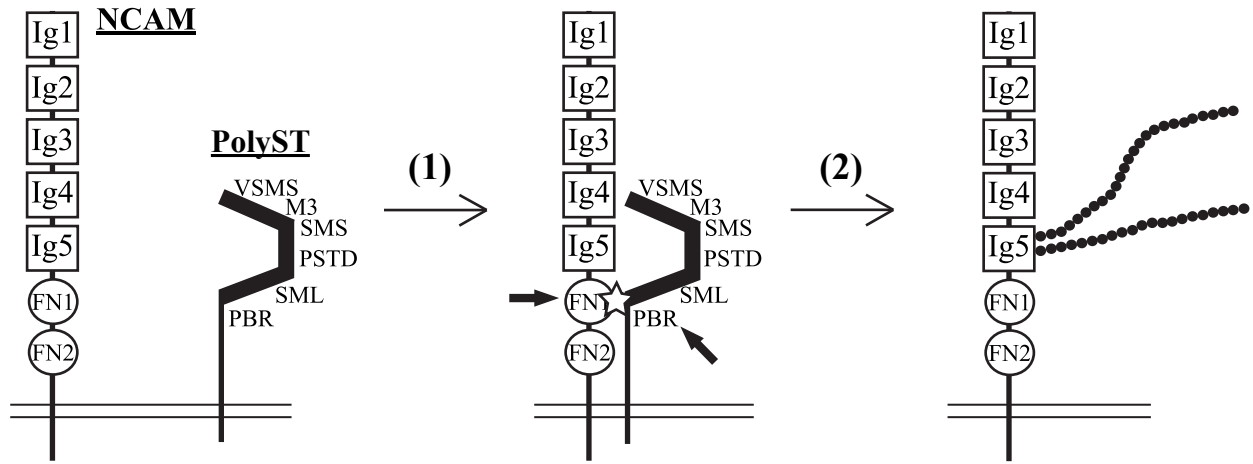

Supplemental Fig. S1. Working Model of NCAM Polysialylation by the polySTs.

**SUPPLEMENTAL FIGURE S2**

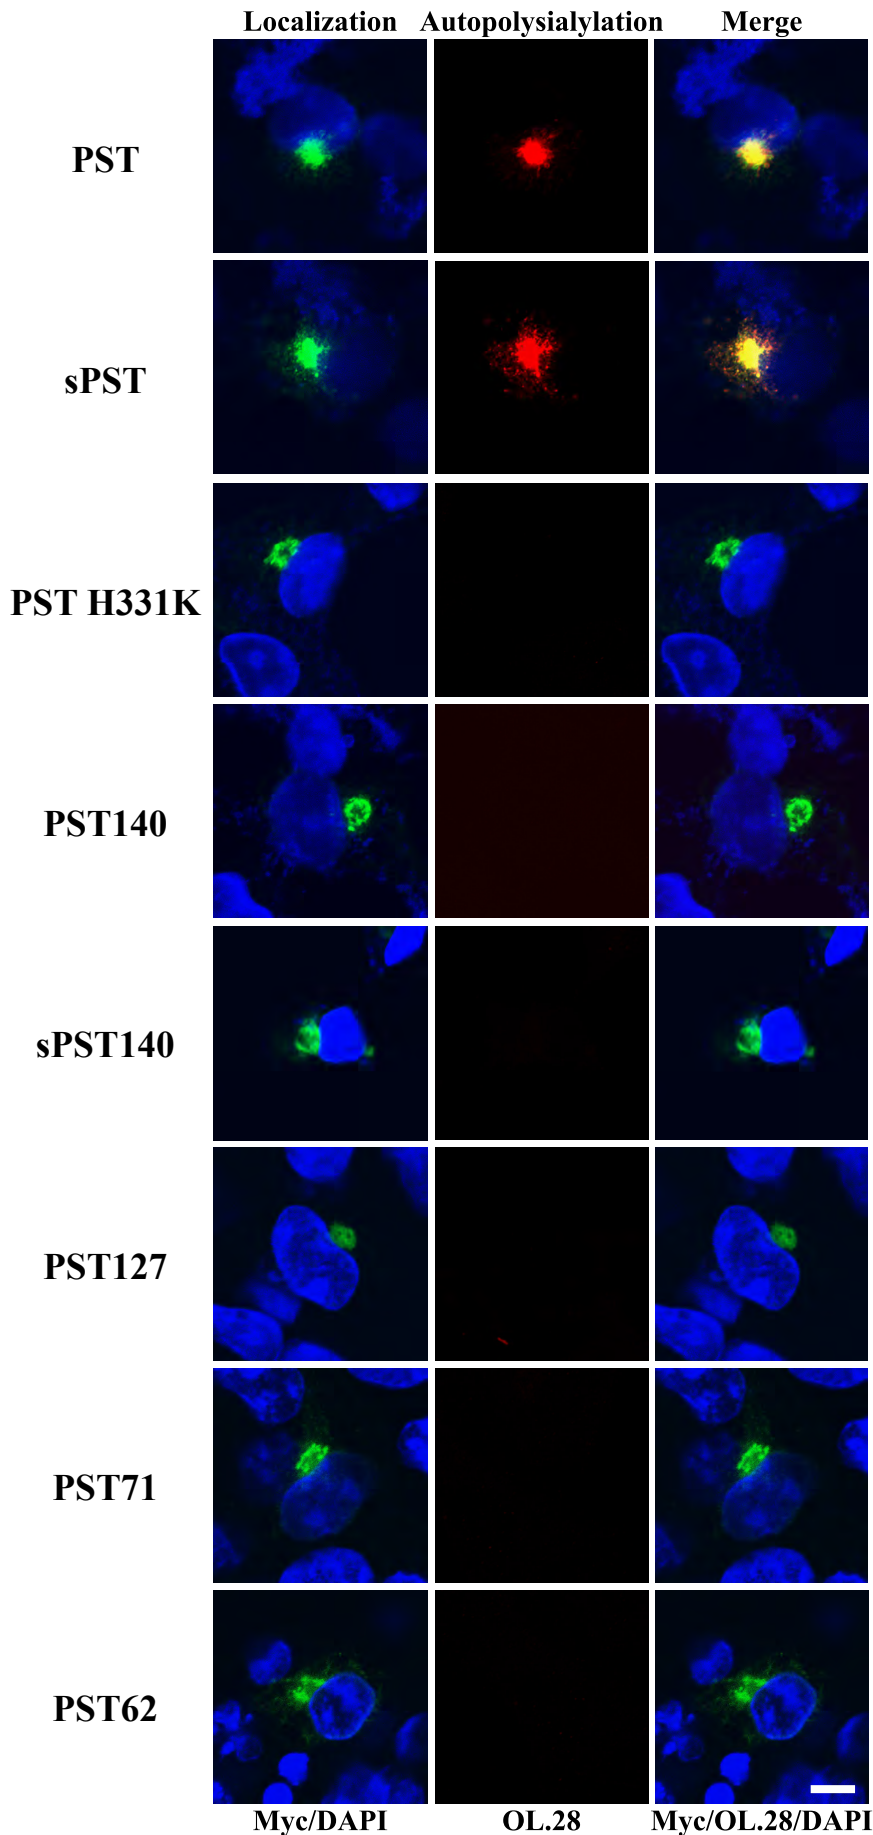

**Supplemental Fig. S2. PST, sPST, PST H331K and all truncated PST mutants are predominantly localized to the Golgi apparatus in COS-1 cells.** Myc-tagged PST, sPST, or a PST mutant were expressed in COS-1 cells as described in supplemental “Experimental Methods.” Cells were then washed, fixed with methanol, and subjected to staining with anti-Myc antibody (*Localization, Myc, green*) to determine protein localization, and OL.28 anti-polySia antibody (*Autopolysialylation, OL.28, red*) to detect autopolysialylation and hence enzyme activity. DAPI staining was utilized to indicate the location of the nucleus (*Localization and Merge, DAPI, blue*). *Bar, 10 μm.*

## SUPPLEMENTAL FIGURE S3

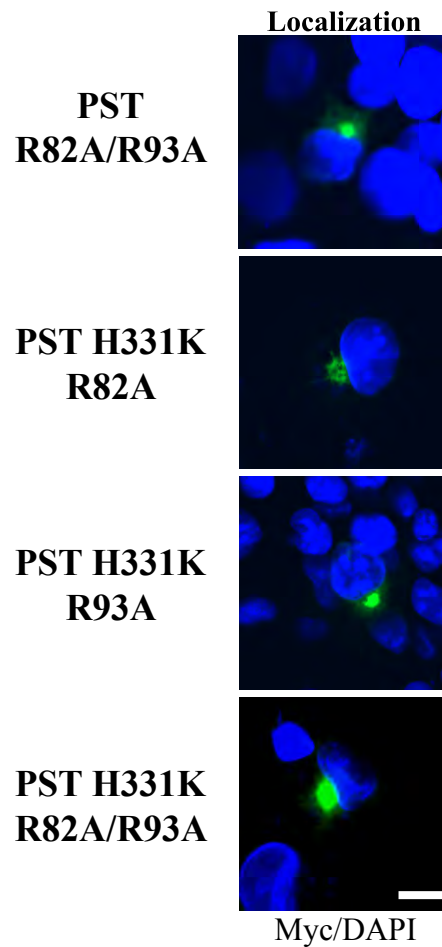

**Supplemental Fig. S3. PST R82A/R93A, PST H331K R82A, PST H331K R93A, and PST H331K R82A/R93A are predominantly localized to the Golgi apparatus in COS-1 cells.** The Myc-tagged PST R82A/R93A and PST H331K PBR mutants shown above were expressed in COS-1 cells as described in supplemental “Experimental Methods.” Cells were then washed, fixed with methanol, and subjected to staining with anti-Myc antibody (*green*) to determine protein localization. Staining with DAPI was utilized to indicate the location of the nucleus (*blue*). Bar, 10  $\mu$ m.
